# Supplementary material for: Life cycle assessment of adipic acid production from lignin
Source: Royal Society of Chemistry journal article supplement (doi:10.1039/c8gc00868j), 2018-01-01
Supplement: c8gc00868j1.pdf [file c8gc00868j1.pdf]

# Supporting information: Life cycle assessment of adipic acid production from lignin

Andrea Corona<sup>a,b</sup>, Mary J. Bidby<sup>b</sup>, Derek Vardon<sup>b</sup>, Morten Birkved<sup>a</sup>, Michael Hauschild<sup>a</sup> and Gregg T. Beckham<sup>b,\*</sup>

<sup>a</sup>Quantitative Sustainability Assessment, Department of Management Engineering, Technical University of Denmark, Bygningstorvet, 2800, Kgs. Lyngby, Denmark

<sup>b</sup>National Bioenergy Center, National Renewable Energy Laboratory, Golden CO 80401, USA

\* Email: gregg.beckham@nrel.gov

## S1. Adipic Acid Conventional Production

Adipic acid is a white crystalline solid used in the production of polymeric fibres, plastics, elastomers and lubricants. Commercially, it is the most used aliphatic dicarboxylic acids.<sup>1</sup> Major utilization of adipic acid is in the nylon 6,6 production. It accounts for approximately 90% of the adipic acid demand.<sup>1</sup> Global adipic acid production in 2010 was approximately 3 million tons,<sup>1</sup> mainly in the United States (30%), the European Union (29%), and China (22%).<sup>2</sup> The number of plant producing adipic acid is limited (<30 worldwide).<sup>3</sup> **Figure S.1** show the worldwide adipic acid production capacity in 2010.

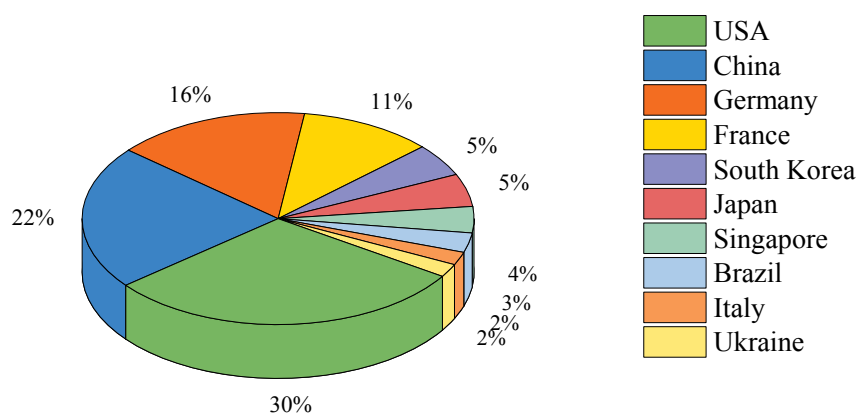

**Figure S1.** Adipic acid production capacity in 2010.<sup>2</sup>

The current industrial process for adipic acid production is a two-steps reaction that uses cyclohexane, nitric acid and air. Cyclohexane is produced by hydrogenation of benzene using Nickel-based or homogeneous catalyst.<sup>4</sup> In the first step cyclohexane is oxidized with air to produce a mixture of cyclohexanol (CH<sub>2</sub>)<sub>5</sub>CHOH, and cyclohexanone (CH<sub>2</sub>)<sub>5</sub>CO, the mixture is commonly called KA oil. In the second step, the KA oil is oxidized by nitric acid to adipic acid (see **Eq.S1**).<sup>4</sup> In this last reaction NO, NO<sub>2</sub> and N<sub>2</sub>O are produced as by-products from HNO<sub>3</sub>. Some HNO<sub>3</sub> can be recycled from NO and NO<sub>2</sub>. N<sub>2</sub>O cannot be recovered and is emitted instead. Stoichiometric emission factor for N<sub>2</sub>O production is 0.3 kg<sub>N<sub>2</sub>O</sub>/kg<sub>adipic acid</sub>.

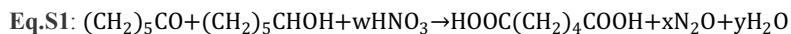

Since 1990, N<sub>2</sub>O was recognized as a strong greenhouse gas (GHG factor is 298 kg<sub>CO<sub>2</sub></sub>/kg<sub>N<sub>2</sub>O</sub>)<sup>5</sup> and several emission reduction strategies were put in place to reduce its emissions from industrial processes.<sup>3</sup> Currently, the most applied emission-abatement strategy is thermal destruction.<sup>3</sup> Thermal destruction is the combustion of off-gases in the presence of methane. Thermal destruction converts N<sub>2</sub>O to primarily NO.<sup>5</sup> Thermal destruction allows a reduction up to 97%-99% of the total N<sub>2</sub>O emission and currently is the most effective technology on reducing the N<sub>2</sub>O emission from the adipic acid and the nitric acid production process. However, N<sub>2</sub>O removal is applied in US and Europe; while around 15% of the global production comes from plant without any emission abatement, mainly from China and Ukraine.<sup>2</sup> **Figure S.2** shows the total world adipic acid production capacity in year with or without N<sub>2</sub>O abatement technology.

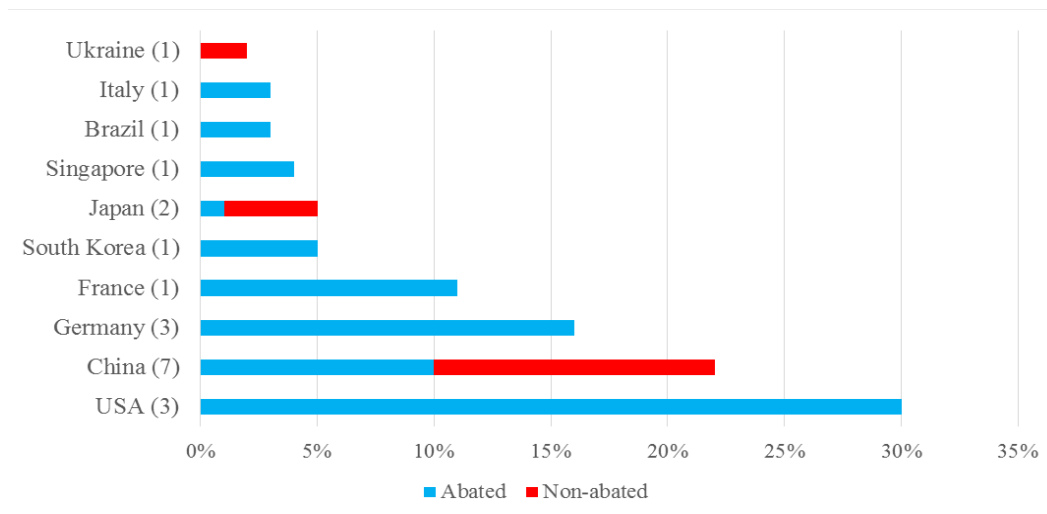

**Figure S2.** Global share of adipic acid production. The figure shows the global share of adipic acid production plant with or without N<sub>2</sub>O abatement technology per country. The number in parenthesis indicates the number of adipic acid plants in the specific country.<sup>2</sup>

In the current study two different scenarios for conventional adipic acid were developed: CONV-AA-US representing a modern plant with the highest N<sub>2</sub>O abatement capacity of 97% and CONV-AA-AVG representing an “average” plant with the world average abatement technology capacity of 85%. In order to evaluate the emission occurred in the two scenarios the IPCC emission factors were used.<sup>6,7</sup> To estimate the emission of N<sub>2</sub>O due to adipic acid production the following equation S.2 was used:

$$\text{Eq. S.2: } E_{N_2O} = \sum (EF_i * AAP_i * (1 - DF_j * UF_j))$$

Where:

E<sub>N<sub>2</sub>O</sub>: Emission of nitrous oxide [kg]

EF<sub>i</sub>= N<sub>2</sub>O emission factor for technology type i [kg N<sub>2</sub>O/metric ton of adipic acid]

AAP<sub>i</sub>= adipic acid production from technology type i [ton]

DF<sub>j</sub>=destruction factor for abatement technology type j [%]

UF<sub>j</sub>= utilization factor for abatement technology type j [%]

**Table S1.** Abatement technology parameters used to estimate the non-abated N<sub>2</sub>O emission.

| Scenario name | Destruction Factor (DF <sub>j</sub> ) | Utilization factor (UF <sub>j</sub> ) |
|---------------|---------------------------------------|---------------------------------------|
| CONV-AA-US    | 98.5% <sup>1</sup>                    | 97% <sup>1</sup>                      |
| CONV-AA-AVG   | 98.5% <sup>1</sup>                    | 85% <sup>2</sup>                      |

<sup>1</sup> From <sup>5</sup>

<sup>2</sup> Calculated based on the world abatement capacity (see Fig S.2)

## S2. Lignin conversion process

In the following tables, parameters used for the conversion process in the Aspen models are presented. **Table S2** shows the composition of the high fermentation lignin byproduct (HFLB) originated in the bioethanol biorefinery. **Table S3-S6** present the properties and parameters used in the Aspen model. All the parameters are normalized on a unitary output.

**Table S2.** HFLB properties and composition.<sup>8</sup>

| <b>Component (Aspen name)</b> | <b>Unit</b> | <b>Value</b> |
|-------------------------------|-------------|--------------|
| H2O                           | Kg/h        | 12796.8      |
| ETHANOL                       | Kg/h        | 5.691        |
| GLUCOSE                       | Kg/h        | 19.407       |
| GALACTOS                      | Kg/h        | 42.601       |
| MANNOSE                       | Kg/h        | 17.875       |
| XYLOSE                        | Kg/h        | 39.537       |
| ARABINOS                      | Kg/h        | 8.193        |
| CELLOB                        | Kg/h        | 12.327       |
| GLUCOLIG                      | Kg/h        | 42.189       |
| GALAOLIG                      | Kg/h        | 1.065        |
| MANOLIG                       | Kg/h        | 0.447        |
| XYLOLIG                       | Kg/h        | 14.541       |
| ARABOLIG                      | Kg/h        | 1.772        |
| EXTRACT                       | Kg/h        | 454.535      |
| LGNSOL                        | Kg/h        | 24.442       |
| HMF                           | Kg/h        | 13.727       |
| FURFURAL                      | Kg/h        | 5.455        |
| LACID                         | Kg/h        | 63.072       |
| XYLITOL                       | Kg/h        | 28.108       |
| GLYCEROL                      | Kg/h        | 6.492        |
| SUCCACID                      | Kg/h        | 17.041       |
| NH4SO4                        | Kg/h        | 92.392       |
| NH4ACET                       | Kg/h        | 69.287       |
| DAP                           | Kg/h        | 4.797        |
| OIL                           | Kg/h        | 0.497        |
| O2                            | Kg/h        | 0.535        |
| N2                            | Kg/h        | 0.954        |
| CELLULOS                      | Kg/h        | 1229.549     |
| GALACTAN                      | Kg/h        | 30.36        |
| MANNAN                        | Kg/h        | 12.738       |
| XYLAN                         | Kg/h        | 414.638      |
| ARABINAN                      | Kg/h        | 50.529       |
| LIGNIN                        | Kg/h        | 12225.69     |
| PROTEIN                       | Kg/h        | 2808.791     |
| ASH                           | Kg/h        | 4025.691     |
| ENZYME                        | Kg/h        | 510.387      |
| DENZ                          | Kg/h        | 56.71        |
| ZYMO                          | Kg/h        | 819.265      |
| TRICHO                        | Kg/h        | 105.646      |
| TAR                           | Kg/h        | 463.634      |
| <b>Properties</b>             |             |              |
| Dry Matter                    | %wt         | 62%          |
| LHV                           | MJ/kg       | 11.59        |

**Table S3.** BCD process details and parameters computed in the Aspen model.

| <b>Parameter</b>                  | <b>Unit</b>           | <b>Value</b> |
|-----------------------------------|-----------------------|--------------|
| Temperature                       | °C                    | 160          |
| Pressure                          | Bar                   | 3.3          |
| HFLB input                        | kg/kg <sub>out</sub>  | 0.379        |
| MP steam input (232°C 9.5atm)     | kg/kg <sub>out</sub>  | 0.862        |
| Water input                       | kg/kg <sub>out</sub>  | 0.047        |
| NaOH load                         | %wt bulk              | 2%           |
| Electricity consumption           | kWh/kg <sub>out</sub> | 0.0142       |
| Deconstruction rate (total solid) | %                     | 70%          |
| Deconstruction rate (lignin)      | %                     | 94%          |
| Deconstruction rate (sugars)      | %                     | 92%          |
| Solid residue                     | kg/kg <sub>out</sub>  | 0.313        |
| DM solid residue                  | %                     | 32%          |
| LHV Solid residue                 | MJ/kg                 | 4.00         |

**Table S4.** Composition and calorific value of the solid residue after BCD process.

| <b>Component (Aspen name)</b> | <b>Unit</b> | <b>Value</b> |
|-------------------------------|-------------|--------------|
| WATER                         | %wt         | 67.95%       |
| CELLULOS                      | %dm         | 1.02%        |
| GALACTAN                      | %dm         | 0.03%        |
| MANNAN                        | %dm         | 0.01%        |
| XYLAN                         | %dm         | 0.34%        |
| ARABINAN                      | %dm         | 0.04%        |
| LIGNIN                        | %dm         | 7.59%        |
| PROTEIN                       | %dm         | 29.07%       |
| ASH                           | %dm         | 41.66%       |
| ENZYME                        | %dm         | 5.28%        |
| DENZ                          | %dm         | 0.59%        |
| ZYMO                          | %dm         | 8.48%        |
| TRICHO                        | %dm         | 1.09%        |
| TAR                           | %dm         | 4.80%        |
| CELLULOS                      | %dm         | 1.02%        |
| <b>Properties</b>             |             |              |
| LHV                           | MJ/kg       | 4.00         |

**Table S5.** Composition of the liquid residue after BCD process.

| Component (Aspen name) | Unit | Value  |
|------------------------|------|--------|
| WATER                  | %wt  | 82.72% |
| ETHANOL                | %wt  | 0.01%  |
| GLUCOSE                | %wt  | 1.32%  |
| GALACTOS               | %wt  | 0.08%  |
| MANNOSE                | %wt  | 0.03%  |
| XYLOSE                 | %wt  | 0.49%  |
| ARABINOS               | %wt  | 0.06%  |
| CELLOB                 | %wt  | 0.01%  |
| GLUCOLIG               | %wt  | 0.04%  |
| GALAOLIG               | %wt  | 0.00%  |
| MANOLIG                | %wt  | 0.00%  |
| XYLOLIG                | %wt  | 0.02%  |
| ARABOLIG               | %wt  | 0.00%  |
| EXTRACT                | %wt  | 0.47%  |
| LGNSOL                 | %wt  | 11.95% |
| HMF                    | %wt  | 0.01%  |
| FURFURAL               | %wt  | 0.01%  |
| LACID                  | %wt  | 0.07%  |
| XYLITOL                | %wt  | 0.03%  |
| GLYCEROL               | %wt  | 0.01%  |
| SUCCACID               | %wt  | 0.02%  |
| NH4SO4                 | %wt  | 0.10%  |
| NH4ACET                | %wt  | 0.07%  |
| DAP                    | %wt  | 0.00%  |
| NAOH                   | %wt  | 2.48%  |
| OIL                    | %wt  | 0.00%  |
| O2                     | %wt  | 0.00%  |
| N2                     | %wt  | 0.00%  |

**Table S6.** Fermentation process details and parameters computed in the Aspen model.

| Parameter                  | Unit                  | Value   |
|----------------------------|-----------------------|---------|
| Temperature                | °C                    | 32      |
| Pressure                   | Bar                   | 1       |
| Deconstructed HFLB input   | kg/kg <sub>out</sub>  | 1.032   |
| Diammonium Phosphate (DAP) | kg/kg <sub>out</sub>  | 2.56E-5 |
| Corn steep liquor (CSL)    | kg/kg <sub>out</sub>  | 2.73E-4 |
| NaOH (neutralizing agent)  | kg/kg <sub>out</sub>  | 4.18E-2 |
| Electricity input          | kWh/kg <sub>out</sub> | 0.034   |
| Metabolic Yield            | %mol                  | 97%     |
| Titer                      | g/L                   | 80      |
| Fermentation time          | h                     | 80      |
| Sodium Muconate production | kg/kg <sub>out</sub>  | 0.151   |

**Table S7.** Separation process details and parameters computed in the Aspen model.

| Parameter                                           | Unit                  | Value    |
|-----------------------------------------------------|-----------------------|----------|
| Temperature                                         | °C                    | 30       |
| Pressure                                            | Bar                   | 1        |
| Fermentation Broth                                  | kg/kg <sub>out</sub>  | 8.87E+00 |
| H <sub>2</sub> SO <sub>4</sub>                      | kg/kg <sub>out</sub>  | 7.93E-01 |
| NaOH                                                | kg/kg <sub>out</sub>  | 4.46E-03 |
| Electricity input                                   | kWh/kg <sub>out</sub> | 4.03E-02 |
| Cooling duties                                      | MJ/ kg <sub>out</sub> | 7.54E-01 |
| Na <sub>2</sub> SO <sub>4</sub> residue to landfill | Kg/kg <sub>out</sub>  | 1.15E+00 |
| Liquid residue to WWT                               | Kg/kg <sub>out</sub>  | 7.52E+00 |

**Table S8.** Catalytic upgrading process details and parameters computed in the Aspen model.

| <b>Parameter</b>      | <b>Unit</b>           | <b>Value</b> |
|-----------------------|-----------------------|--------------|
| Temperature           | °C                    | 75           |
| Pressure              | Bar                   | 33           |
| Muconic acid          | kg/kg <sub>out</sub>  | 9.73E-01     |
| Ethanol               | kg/kg <sub>out</sub>  | 8.75E+00     |
| Hydrogen              | kg/kg <sub>out</sub>  | 5.52E-02     |
| Ethanol recycling     | kWh/kg <sub>out</sub> | 99.23%       |
| Hydrogen recycling    | MJ/ kg <sub>out</sub> | 51.66%       |
| Electricity           | Kg/kg <sub>out</sub>  | 8.67E-02     |
| Heat                  | MJ/kg <sub>out</sub>  | 2.06E+01     |
| Cooling               | MJ/kg <sub>out</sub>  | 2.34E+00     |
| Conversion efficiency | %                     | 100%         |

### S3: Life Cycle inventory

**Table S9.** Life Cycle Inventory for the production of 1 kg of adipic acid.

|                  | Component                      | Unit            | Total    | Feedstock | BCD      | Fermentation | Separation | Upgrade  |
|------------------|--------------------------------|-----------------|----------|-----------|----------|--------------|------------|----------|
| Material         | HFLB                           | kg              | 3.37E+00 |           | 3.37E+00 |              |            |          |
|                  | NaOH                           | kg              | 5.85E-01 |           | 2.21E-01 | 3.60E-01     | 4.34E-03   | 4.34E-03 |
|                  | Water                          | kg              | 4.17E-01 |           | 4.17E-01 |              |            |          |
|                  | Air                            | kg              | 4.03E+00 |           |          | 4.03E+00     |            |          |
|                  | Diammonium Phosphate           | kg              | 2.20E-04 |           |          | 2.20E-04     |            |          |
|                  | Corn steep liquor              | kg              | 2.35E-03 |           |          | 2.35E-03     |            |          |
|                  | H <sub>2</sub> SO <sub>4</sub> | kg              | 7.72E-01 |           |          |              | 7.72E-01   | 7.72E-01 |
|                  | Ethanol makeup                 | kg              | 6.74E-02 |           |          |              |            | 6.74E-02 |
|                  | H <sub>2</sub> makeup          | kg              | 2.85E-02 |           |          |              |            | 2.85E-02 |
|                  | Catalyst Rh/C                  | kg              | 1.10E-05 |           |          |              |            | 1.10E-05 |
|                  | Waste                          | Solid to boiler | kg       | 2.78E+00  |          | 2.78E+00     |            |          |
| Residue to WWT   |                                | kg              | 7.93E+00 |           |          |              | 7.76E+00   |          |
| Salt to landfill |                                | kg              |          |           |          |              | 1.12E+00   |          |
| Energy           | Heat                           | MJ              | 2.06E+01 |           |          |              |            | 2.06E+01 |
|                  | Steam                          | kg              | 7.67E+00 |           | 7.67E+00 |              |            |          |
|                  | Cooling                        | MJ              | 1.18E+01 |           |          |              | 7.34E-01   | 1.18E+01 |
|                  | Electricity                    | kWh             | 5.45E-01 |           |          | 2.93E-01     | 3.92E-02   | 1.26E-01 |

**Table S10.** Inventory for related to the utilization of 1kg of HFLB. The inventory is calculated as the difference between the utilization of the HFLB minus the solid residue after the BCD process.

| <b>Output</b>                                        | <b>Amount</b> | <b>Unit</b> | <b>EcolInvent process</b>                                                | <b>Ref</b> |
|------------------------------------------------------|---------------|-------------|--------------------------------------------------------------------------|------------|
| 1) HFLB                                              | 1.000         | kg          |                                                                          |            |
| <b>Output/Avoided</b>                                |               |             |                                                                          |            |
| Lime                                                 | 1.23E-02      |             | Lime {GLO}  market for   Conseq, U                                       | 5          |
| <b>Input from Technosphere, Energy and Materials</b> |               |             |                                                                          |            |
| Heat                                                 | 4.730         | MJ          | ADAPT_NREL_HEAT                                                          | 5          |
| Electricity                                          | 0.424         | Kwh         | Electricity, medium voltage {MRO, US only};Market for   Consequential, U | 5          |
| <b>Output Emission to Air</b>                        |               |             |                                                                          |            |
| PM (filterable)                                      | -1.99E-05     | kg          |                                                                          | 6          |
| PM10                                                 | -1.84E-05     | kg          |                                                                          | 6          |
| PM2.5                                                | -1.59E-05     | kg          |                                                                          | 6          |
| PM (condensable)                                     | -6.05E-07     | kg          |                                                                          | 6          |
| SO2                                                  | -1.11E-04     | kg          |                                                                          | 6          |
| NOx                                                  | -3.53E-04     | kg          |                                                                          | 6          |
| CO <sub>bio</sub>                                    | -1.64E-03     | kg          |                                                                          | 6          |
| VOC                                                  | -6.05E-05     | kg          |                                                                          | 6          |
| CH <sub>4bio</sub>                                   | -7.48E-05     | kg          |                                                                          | 6          |
| N2O                                                  | -4.63E-05     | kg          |                                                                          | 6          |
| Sulfuric Acid Mist (H <sub>2</sub> SO <sub>4</sub> ) | -1.40E-05     | kg          |                                                                          | 6          |
| Ammonia (NH <sub>3</sub> )                           | -1.50E-07     | kg          |                                                                          | 6          |
| Acetaldehyde                                         | -2.96E-06     | kg          |                                                                          | 6          |
| Acetophenone                                         | -1.14E-11     | kg          |                                                                          | 6          |
| Acrolein                                             | -1.42E-05     | kg          |                                                                          | 6          |
| Antimony & Compounds                                 | -2.81E-08     | kg          |                                                                          | 6          |
| Arsenic & Compounds                                  | -3.92E-08     | kg          |                                                                          | 6          |
| Benzene                                              | -1.50E-05     | kg          |                                                                          | 6          |
| Benzo(a)pyrene                                       | -9.26E-09     | kg          |                                                                          | 6          |
| Beryllium metal (un-reacted)                         | -1.70E-10     | kg          |                                                                          | 6          |
| Cadmium Metal (elemental un-reacted)                 | -4.10E-09     | kg          |                                                                          | 6          |
| Carbon tetrachloride                                 | -1.60E-07     | kg          |                                                                          | 6          |
| Chlorine                                             | -2.81E-06     | kg          |                                                                          | 6          |
| Chlorobenzene                                        | -1.18E-07     | kg          |                                                                          | 6          |
| Chloroform                                           | -9.97E-08     | kg          |                                                                          | 6          |
| Chromium-Other compounds                             | -1.13E-08     | kg          |                                                                          | 6          |
| Cobalt compounds                                     | -2.31E-08     | kg          |                                                                          | 6          |
| Dinitrophenol, 2,4-                                  | -6.41E-10     | kg          |                                                                          | 6          |
| Di(2-ethylhexyl)phthalate (DEHP)                     | -1.67E-10     | kg          |                                                                          | 6          |
| Ethyl benzene                                        | -1.10E-07     | kg          |                                                                          | 6          |
| Ethylene dichloride (1,2-dichloroethane)             | -1.03E-07     | kg          |                                                                          | 6          |
| Formaldehyde                                         | -1.57E-05     | kg          |                                                                          | 6          |
| Hydrogen chloride (hydrochloric acid)                | -5.27E-06     | kg          |                                                                          | 6          |
| Hydrogen flouride                                    | -4.70E-07     | kg          |                                                                          | 6          |
| Lead                                                 | -1.71E-07     | kg          |                                                                          | 6          |
| Manganese & compounds                                | -2.73E-08     | kg          |                                                                          | 6          |
| Mercury, vapor                                       | -6.16E-09     | kg          |                                                                          | 6          |
| Methyl bromide (bromomethane)                        | -5.34E-08     | kg          |                                                                          | 6          |
| Methyl chloride (chloromethane)                      | -8.19E-08     | kg          |                                                                          | 6          |
| Methyl chloroform (1,1,1 trichloroethane)            | -1.10E-07     | kg          |                                                                          | 6          |
| Methylene chloride (dichloromethane)                 | -1.03E-06     | kg          |                                                                          | 6          |
| Naphthalene                                          | -3.45E-07     | kg          |                                                                          | 6          |
| Nickel metal (Component of Nickel & Compounds)       | -6.80E-09     | kg          |                                                                          | 6          |
| Pentachlorophenol                                    | -1.82E-10     | kg          |                                                                          | 6          |
| Phenol                                               | -1.82E-07     | kg          |                                                                          | 6          |
| Phosphorus Metal, Yellow or White                    | -9.62E-08     | kg          |                                                                          | 6          |
| Polychlorinated biphenyls                            | -2.90E-11     | kg          |                                                                          | 6          |
| Polycyclic Organic Matter                            | -4.45E-07     | kg          |                                                                          | 6          |
| Propionaldehyde                                      | -2.17E-07     | kg          |                                                                          | 6          |
| Propylene dichloride (1,2 dichloropropane)           | -1.18E-07     | kg          |                                                                          | 6          |
| Selenium compounds                                   | -1.79E-08     | kg          |                                                                          | 6          |
| Styrene                                              | -6.77E-06     | kg          |                                                                          | 6          |
| Tetrachlorodibenzo-p-dioxin, 2,3,7,8-                | -3.06E-14     | kg          |                                                                          | 6          |
| Toluene                                              | -3.28E-06     | kg          |                                                                          | 6          |
| Trichloroethylene                                    | -1.07E-07     | kg          |                                                                          | 6          |



|                         |                                        |    |                                                                               |   |
|-------------------------|----------------------------------------|----|-------------------------------------------------------------------------------|---|
| Trichlorophenol, 2,4,6- | -7.83E-11                              | kg |                                                                               | 6 |
| Vinyl chloride          | -6.41E-08                              | kg |                                                                               | 6 |
| Xylene, o-              | -8.90E-08                              | kg |                                                                               | 6 |
| <hr/>                   |                                        |    |                                                                               |   |
|                         | <b>Waste and Emission to treatment</b> |    |                                                                               |   |
| Ash+baghouse            | -1.64E-02                              | kg | Wood ash mixture, pure {RoW}   treatment of,<br>sanitary landfill   Conseq, U | 6 |
| <hr/>                   |                                        |    |                                                                               |   |

#### S4: Additional LCA result not presented in the manuscript

**Table S11.** Midpoint results for the biobased adipic acid produced in US, biobased adipic acid produced in Denmark, conventional adipic acid produced in US and conventional adipic acid with world average N2O capture potential.

| Impact category       | Unit                    | BIO-AA-US | CONV-AA-AVG | CONV-AA-US | BIO-AA-DK |
|-----------------------|-------------------------|-----------|-------------|------------|-----------|
| Ozone depletion       | Kg CFC <sub>11-eq</sub> | -1.11E-08 | 7.39E-07    | 7.38E-07   | 9.51E-09  |
| GHG emissions         | Kg CO <sub>2-eq</sub>   | 4.87E+00  | 2.26E+01    | 1.29E+01   | 4.27E+00  |
| Smog                  | Kg O <sub>3-eq</sub>    | 1.31E-01  | 1.02E+00    | 1.00E+00   | 1.17E-01  |
| Acidification         | Kg SO <sub>2-eq</sub>   | 2.87E-02  | 6.18E-02    | 6.03E-02   | 1.83E-02  |
| Eutrophication        | Kg N <sub>-eq</sub>     | 3.64E-03  | 4.54E-03    | 5.24E-03   | 3.17E-03  |
| Carcinogenics         | CTU <sub>h</sub>        | 2.72E-08  | 3.65E-08    | 3.79E-08   | 2.40E-08  |
| Non carcinogenics     | CTU <sub>h</sub>        | 3.59E-07  | 3.70E-07    | 3.79E-07   | 3.07E-07  |
| Respiratory effects   | Kg PM <sub>2.5</sub>    | 6.56E-03  | 1.07E-03    | 2.95E-03   | 4.55E-03  |
| Ecotoxicity           | CTU <sub>e</sub>        | 2.52E+00  | 3.18E+00    | 3.18E+00   | 1.31E+00  |
| Fossil fuel depletion | Kg CFC <sub>11-eq</sub> | 1.38E+01  | 1.73E+01    | 1.71E+01   | 1.45E+01  |

**Table S12.** Detailed results of the CONV-AA-US acid scenario. Each scenario has been divided to show the specific contribution of the feedstock materials, production process and the un-abated emission.

| Impact category       | Unit                    | Total    | Unabated emission | Cyclohexane | Nitric acid | Production process |
|-----------------------|-------------------------|----------|-------------------|-------------|-------------|--------------------|
| Ozone depletion       | Kg CFC <sub>11-eq</sub> | 7.38E-07 | 0.00E+00          | 9.56E-09    | 2.39E-07    | 4.90E-07           |
| GHG emissions         | Kg CO <sub>2-eq</sub>   | 1.29E+01 | 3.58E+00          | 1.33E+00    | 4.63E+00    | 3.31E+00           |
| Smog                  | Kg O <sub>3-eq</sub>    | 1.00E+00 | 6.69E-01          | 5.28E-02    | 2.10E-01    | 6.92E-02           |
| Acidification         | Kg SO <sub>2-eq</sub>   | 6.03E-02 | 2.89E-02          | 4.40E-03    | 1.70E-02    | 1.00E-02           |
| Eutrophication        | Kg N <sub>-eq</sub>     | 5.24E-03 | 1.85E-03          | 4.93E-04    | 1.97E-03    | 9.32E-04           |
| Carcinogenics         | CTU <sub>h</sub>        | 3.79E-08 | 0.00E+00          | 1.40E-08    | 1.25E-08    | 1.14E-08           |
| Non carcinogenics     | CTU <sub>h</sub>        | 3.79E-07 | 0.00E+00          | 3.32E-08    | 1.30E-07    | 2.16E-07           |
| Respiratory effects   | Kg PM <sub>2.5</sub>    | 2.95E-03 | 0.00E+00          | 4.52E-04    | 1.43E-03    | 1.07E-03           |
| Ecotoxicity           | CTU <sub>e</sub>        | 3.18E+00 | 0.00E+00          | 5.14E-01    | 1.58E+00    | 1.09E+00           |
| Fossil fuel depletion | Kg CFC <sub>11-eq</sub> | 1.71E+01 | 0.00E+00          | 6.72E+00    | 2.68E+00    | 7.73E+00           |

**Table S13.** Detailed results of the CONV-AA-AVG acid scenario. Each scenario has been divided to show the specific contribution of the feedstock materials, production process and the un-abated emission.

| Impact category       | Unit                    | Total    | Unabated emission | Cyclohexane | Nitric acid | Production process |
|-----------------------|-------------------------|----------|-------------------|-------------|-------------|--------------------|
| Ozone depletion       | Kg CFC <sub>11-eq</sub> | 7.39E-07 | 0.00E+00          | 9.58E-09    | 2.39E-07    | 4.91E-07           |
| GHG emissions         | Kg CO <sub>2-eq</sub>   | 2.26E+01 | 1.34E+01          | 1.33E+00    | 4.63E+00    | 3.25E+00           |
| Smog                  | Kg O <sub>3-eq</sub>    | 1.13E+00 | 7.80E-01          | 5.31E-02    | 2.10E-01    | 8.77E-02           |
| Acidification         | Kg SO <sub>2-eq</sub>   | 6.66E-02 | 3.36E-02          | 4.42E-03    | 1.70E-02    | 1.16E-02           |
| Eutrophication        | Kg N <sub>-eq</sub>     | 4.84E-03 | 2.16E-03          | 4.82E-04    | 1.97E-03    | 2.39E-04           |
| Carcinogenics         | CTU <sub>h</sub>        | 3.66E-08 | 0.00E+00          | 1.40E-08    | 1.25E-08    | 1.02E-08           |
| Non carcinogenics     | CTU <sub>h</sub>        | 3.70E-07 | 0.00E+00          | 3.30E-08    | 1.30E-07    | 2.07E-07           |
| Respiratory effects   | Kg PM <sub>2.5</sub>    | 1.07E-03 | 0.00E+00          | 4.21E-04    | 1.43E-03    | -7.78E-04          |
| Ecotoxicity           | CTU <sub>e</sub>        | 3.19E+00 | 0.00E+00          | 5.14E-01    | 1.58E+00    | 1.10E+00           |
| Fossil fuel depletion | Kg CFC <sub>11-eq</sub> | 1.73E+01 | 0.00E+00          | 6.72E+00    | 2.68E+00    | 7.90E+00           |

**Table S14.** Detailed LCIA midpoint results of the feedstock impacts. The table show the contribution of each input and output on the total score of the process.

| Impact category       | Unit                    | Total     | CHP natural gas | Avoided lignin combustion | Avoided ash disposal | Avoided lime FGD |
|-----------------------|-------------------------|-----------|-----------------|---------------------------|----------------------|------------------|
| Ozone depletion       | Kg CFC <sub>11-eq</sub> | -1.28E-07 | 4.57E-08        | -1.74E-07                 | -6.86E-11            | -3.37E-11        |
| GHG emissions         | Kg CO <sub>2-eq</sub>   | 4.37E-01  | 4.53E-01        | -1.57E-02                 | -2.89E-04            | -3.83E-04        |
| Smog                  | Kg O <sub>3-eq</sub>    | -3.97E-03 | 5.42E-03        | -9.33E-03                 | -3.36E-05            | -3.12E-05        |
| Acidification         | Kg SO <sub>2-eq</sub>   | 8.39E-04  | 1.22E-03        | -3.73E-04                 | -2.66E-06            | -2.39E-06        |
| Eutrophication        | Kg N <sub>-eq</sub>     | 8.98E-06  | 2.64E-05        | -1.57E-05                 | -1.38E-06            | -3.53E-07        |
| Carcinogenics         | CTU <sub>h</sub>        | 4.67E-10  | 8.11E-10        | -3.29E-10                 | -1.28E-11            | -2.72E-12        |
| Non carcinogenics     | CTU <sub>h</sub>        | -1.07E-08 | 6.69E-09        | -1.73E-08                 | -6.73E-11            | -4.45E-11        |
| Respiratory effects   | Kg PM <sub>2.5</sub>    | 7.21E-05  | 1.04E-04        | -3.00E-05                 | -4.60E-07            | -1.21E-06        |
| Ecotoxicity           | CTU <sub>e</sub>        | 1.34E-01  | 1.40E-01        | -4.49E-03                 | -1.25E-03            | -1.85E-04        |
| Fossil fuel depletion | MJ surplus              | 1.12E+00  | 1.12E+00        | 0                         | -6.33E-04            | -3.96E-04        |

**Table S15.** Detailed LCIA midpoint results of the BCD process. The table show the contribution of each input and output on the total score of the process.

| Impact category       | Unit                    | Total    | NaOH     | Steam    | Tap Water | Electricity |
|-----------------------|-------------------------|----------|----------|----------|-----------|-------------|
| Ozone depletion       | Kg CFC <sub>11-eq</sub> | 1.73E-08 | 1.45E-09 | 1.52E-08 | 2.97E-12  | 7.23E-10    |
| GHG emissions         | Kg CO <sub>2-eq</sub>   | 1.99E-01 | 3.84E-02 | 1.51E-01 | 4.77E-05  | 9.39E-03    |
| Smog                  | Kg O <sub>3-eq</sub>    | 4.66E-03 | 2.58E-03 | 1.84E-03 | 2.84E-06  | 2.44E-04    |
| Acidification         | Kg SO <sub>2-eq</sub>   | 8.14E-04 | 3.77E-04 | 4.06E-04 | 2.48E-07  | 3.04E-05    |
| Eutrophication        | Kg N <sub>eq</sub>      | 1.12E-04 | 9.26E-05 | 9.19E-06 | 2.67E-08  | 1.05E-05    |
| Carcinogenics         | CTU <sub>h</sub>        | 7.34E-10 | 3.89E-10 | 3.09E-10 | 2.08E-12  | 3.38E-11    |
| Non carcinogenics     | CTU <sub>h</sub>        | 1.36E-08 | 1.08E-08 | 2.40E-09 | 9.62E-12  | 4.16E-10    |
| Respiratory effects   | Kg PM <sub>2.5</sub>    | 2.21E-04 | 1.50E-04 | 3.56E-05 | 9.01E-08  | 3.54E-05    |
| Ecotoxicity           | CTU <sub>e</sub>        | 6.97E-02 | 2.12E-02 | 4.71E-02 | 5.29E-05  | 1.32E-03    |
| Fossil fuel depletion | MJ surplus              | 3.86E-01 | 1.02E-02 | 3.72E-01 | 4.61E-05  | 3.25E-03    |

**Table S16.** Detailed LCIA midpoint results of the fermentation process. The table show the contribution of each input and output on the total score of the process.

| Impact category       | Unit                    | Total    | Diammonium phosphate | Corn steep liquor | Sodium hydroxide | Electricity |
|-----------------------|-------------------------|----------|----------------------|-------------------|------------------|-------------|
| Ozone depletion       | Kg CFC <sub>11-eq</sub> | 4.07E-09 | 9.62E-12             | 0.00E+00          | 2.43E-09         | 1.63E-09    |
| GHG emissions         | Kg CO <sub>2-eq</sub>   | 8.58E-02 | 5.82E-05             | 2.45E-06          | 6.46E-02         | 2.12E-02    |
| Smog                  | Kg O <sub>3-eq</sub>    | 4.88E-03 | 3.93E-06             | 2.02E-07          | 4.33E-03         | 5.49E-04    |
| Acidification         | Kg SO <sub>2-eq</sub>   | 7.04E-04 | 7.44E-07             | 2.31E-06          | 6.33E-04         | 6.84E-05    |
| Eutrophication        | Kg N <sub>eq</sub>      | 1.80E-04 | 3.74E-07             | 3.89E-08          | 1.56E-04         | 2.36E-05    |
| Carcinogenics         | CTU <sub>h</sub>        | 7.33E-10 | 3.88E-12             | 3.67E-16          | 6.53E-10         | 7.62E-11    |
| Non carcinogenics     | CTU <sub>h</sub>        | 1.91E-08 | 1.31E-11             | 3.72E-15          | 1.82E-08         | 9.37E-10    |
| Respiratory effects   | Kg PM <sub>2.5</sub>    | 3.32E-04 | 1.11E-07             | 1.39E-07          | 2.52E-04         | 7.97E-05    |
| Ecotoxicity           | CTU <sub>e</sub>        | 3.88E-02 | 1.62E-04             | 6.35E-09          | 3.57E-02         | 2.98E-03    |
| Fossil fuel depletion | MJ surplus              | 2.45E-02 | 1.38E-04             | 3.38E-06          | 1.71E-02         | 7.32E-03    |

**Table S17.** Detailed LCIA midpoint results of the separation process. The table show the contribution of each input and output on the total score of the process.

| Impact category       | Unit                    | Total     | NaOH     | H2SO4    | Electricity | Cooling  | Biogas WWT | WWT      | Waste disposal |
|-----------------------|-------------------------|-----------|----------|----------|-------------|----------|------------|----------|----------------|
| Ozone depletion       | Kg CFC <sub>11-eq</sub> | -1.32E-08 | 2.31E-10 | 1.20E-08 | 1.24E-09    | 5.75E-09 | -3.82E-08  | 1.19E-11 | 5.78E-09       |
| GHG emissions         | Kg CO <sub>2-eq</sub>   | 1.79E-01  | 6.15E-03 | 8.65E-02 | 3.29E-02    | 5.77E-02 | -2.13E-02  | 1.00E-04 | 1.74E-02       |
| Smog                  | Kg O <sub>3-eq</sub>    | 2.29E-02  | 4.12E-04 | 1.86E-02 | 1.07E-03    | 8.79E-04 | -1.19E-03  | 1.04E-05 | 3.12E-03       |
| Acidification         | Kg SO <sub>2-eq</sub>   | 5.16E-03  | 6.03E-05 | 5.41E-03 | 1.13E-04    | 1.69E-04 | -7.21E-04  | 9.80E-07 | 1.31E-04       |
| Eutrophication        | Kg N <sub>eq</sub>      | 3.29E-04  | 1.48E-05 | 2.32E-04 | 4.09E-05    | 2.47E-05 | -9.73E-06  | 8.41E-06 | 1.73E-05       |
| Carcinogenics         | CTU <sub>h</sub>        | 3.46E-09  | 6.22E-11 | 3.16E-09 | 1.19E-10    | 3.81E-10 | -4.10E-10  | 2.78E-11 | 1.17E-10       |
| Non carcinogenics     | CTU <sub>h</sub>        | 3.17E-08  | 1.73E-09 | 2.64E-08 | 1.45E-09    | 2.95E-09 | -3.88E-09  | 5.78E-10 | 2.43E-09       |
| Respiratory effects   | Kg PM <sub>2.5</sub>    | 5.85E-04  | 2.40E-05 | 4.39E-04 | 1.33E-04    | 2.03E-05 | -5.71E-05  | 1.58E-07 | 2.50E-05       |
| Ecotoxicity           | CTU <sub>e</sub>        | 1.36E-01  | 3.40E-03 | 1.61E-01 | 3.25E-03    | 2.51E-02 | -9.12E-02  | 1.22E-03 | 3.33E-02       |
| Fossil fuel depletion | MJ surplus              | -1.13E-01 | 1.63E-03 | 1.07E-01 | 4.92E-03    | 1.38E-01 | -4.16E-01  | 9.30E-05 | 5.21E-02       |

**Table S18.** Detailed LCIA midpoint results of the hydrogenation process. The table show the contribution of each input and output on the total score of the process.

| Impact category       | Unit                    | Total    | Catalytic Process | Ethanol recycling | Hydrogen recycling | Adipic acid crystallization |
|-----------------------|-------------------------|----------|-------------------|-------------------|--------------------|-----------------------------|
| Ozone depletion       | Kg CFC <sub>11-eq</sub> | 2.44E-07 | 1.03E-07          | 1.35E-07          | 1.03E-10           | 5.48E-09                    |
| GHG emissions         | Kg CO <sub>2-eq</sub>   | 2.53E+00 | 1.12E+00          | 1.35E+00          | 1.24E-03           | 5.50E-02                    |
| Smog                  | Kg O <sub>3-eq</sub>    | 3.83E-02 | 1.87E-02          | 1.87E-02          | 2.88E-05           | 8.37E-04                    |
| Acidification         | Kg SO <sub>2-eq</sub>   | 7.56E-03 | 3.58E-03          | 3.81E-03          | 3.92E-06           | 1.61E-04                    |
| Eutrophication        | Kg N <sub>eq</sub>      | 7.50E-04 | 3.54E-04          | 3.71E-04          | 1.16E-06           | 2.35E-05                    |
| Carcinogenics         | CTU <sub>h</sub>        | 9.41E-09 | 2.81E-09          | 6.23E-09          | 5.47E-12           | 3.63E-10                    |
| Non carcinogenics     | CTU <sub>h</sub>        | 7.77E-08 | 2.62E-08          | 4.87E-08          | 5.73E-11           | 2.81E-09                    |
| Respiratory effects   | Kg PM <sub>2.5</sub>    | 9.30E-04 | 5.00E-04          | 4.07E-04          | 3.56E-06           | 1.94E-05                    |
| Ecotoxicity           | CTU <sub>e</sub>        | 9.85E-01 | 4.45E-01          | 5.16E-01          | 2.72E-04           | 2.39E-02                    |
| Fossil fuel depletion | Kg CFC <sub>11-eq</sub> | 6.51E+00 | 3.10E+00          | 3.27E+00          | 1.10E-03           | 1.31E-01                    |

## References

- 1 US-EPA, *Technical Support Document for the Adipic Acid Production Sector : Proposed Rule for Mandatory Reporting of Greenhouse Gases*, 2009.
- 2 L. R. Schneider, M. Lazarus and A. Kollmuss, *Industrial N<sub>2</sub>O projects under the CDM: Adipic acid - a case of carbon leakage?*, Stockholm, 2010.
- 3 US-EPA, *Global Mitigation of Non-CO<sub>2</sub> Greenhouse Gases: 2010-2030*, 2013.
- 4 Q. Wang, I. Vural Gürsel, M. Shang and V. Hessel, *Chem. Eng. J.*, 2013, **234**, 300–311.
- 5 IPCC, in *IPCC Guidelines for National Greenhouse Gas Inventories*, 2006.
- 6 IPCC, *2006 IPCC Guidelines for National Greenhouse Gas Inventories Volume 4 Agriculture, Forestry and Other Land Use*, 2006.
- 7 H. Mainhardt and D. Kruger, *IPCC Good Pract. Guid. Uncertain. Manag. Natl. Greenh. Gas Invent.*, 2000, 183–195.
- 8 D. Humbird, R. Davis, L. Tao, C. Kinchin, D. D. Hsu and A. Aden, *Process Design and Economics for Biochemical Conversion of Lignocellulosic Biomass to Ethanol*, 2011, vol. 303.
